# Supplementary material for: Age-Dependent Changes in Protist and Fungal Microbiota in a Peruvian Cattle Genetic Nucleus
Source: Preprints.org preprint supplement (doi:10.20944/preprints202406.1556.v1), 2024-06-24
Supplement: Supplementary file 1 [file supplementary]

## Sheet: S1
Table S1. List of abbreviations
Hematocrit	HCT
Hemoglobin	HGB
Erythrocytes	RBC
Mean Corpuscular Volume	MCV
Mean Corpuscular Hemoglobin	MCH
Mean Corpuscular Hemoglobin Concentration	MCHC
Leukocytes	WBC
Neutrophils	NEU
Segmented cells	SEG
Lymphocytes	LYM
Monocytes	MON
Eosinophils	EOS
Basophils	BAS%
Neutrophils (%)	NEU%
Lymphocytes (%)	LYM%
Monocytes (%)	MON%
Eosinophils (%)	EOS%
Basophils (%)	BAS%
Segmented (%)	SEG%
Total proteins	TP
Triglycerides	TG
Platelets	PLT

## Sheet: S2
Table S2.Blood parameters of three age groups
Code of nucleus genetic catle	Year	Sex	HCT	HGB	RBC	MCV	MCHC	MCH	WBC	NEU	SEG	LYM	MON	EOS	BAS	NEU%	SEG%	LYM%	MON%	EOS%	BAS%	TP	TG
58	4 y 5 m	Female	34.7	11.5	8.01	43.32	33.14	14.36	8.82	53	53	35	3	9	0	4.67	4.67	3.09	0.26	0.79	0	8	29
66	4 y 5 m	Female	31	10.4	6.75	45.93	33.55	15.41	8.81	67	67	28	2	2	1	5.9	5.9	2.47	0.18	0.18	0.09	8.4	39
67	4 y 5 m	Female	31.8	10.7	7.04	45.17	33.65	15.2	12.1	52	52	40	3	4	1	6.29	6.29	4.84	0.36	0.48	0.12	9	34
76	4 y 5 m	Female	40.2	12.8	8.37	48.03	31.84	15.29	10.05	50	50	36	8	4	2	5.03	5.03	3.62	0.8	0.4	0.2	9	30
89	4 y 5 m	Male	43.6	14.2	8.79	49.6	32.57	16.15	7.46	29	29	42	10	16	3	2.16	2.16	3.13	0.75	1.19	0.22	8.6	33
106	4 y 5 m	Male	33.9	11.4	7.43	45.63	33.63	15.34	6.38	37	37	54	4	4	1	2.36	2.36	3.45	0.26	0.26	0.06	8.5	9
117	4 y 5 m	Male	31	10.3	7	44.29	33.23	14.71	5.85	33	33	61	4	1.5	0.5	1.93	1.93	3.57	0.23	0.09	0.03	8.5	10
221	5 m	Female	28.9	9.2	8.41	34.36	31.83	10.94	11.87	27	27	67	1	1	4	3.2	3.2	7.95	0.12	0.12	0.47	6.9	20
224	5 m	Female	50.4	14.9	13.8	36.52	29.56	10.8	8.98	34	34	57	5	3	1	3.05	3.05	5.12	0.45	0.27	0.09	7.4	33
217	5 m	Female	34.5	11.2	11.3	30.53	32.46	9.91	11.27	28	28	70	1	1	0	3.16	3.16	7.89	0.11	0.11	0	6.5	21
216	5 m	Female	33.9	10.4	10.5	32.29	30.68	9.9	11.58	36	36	56	7	1	0	4.17	4.17	6.48	0.81	0.12	0	7	48
222	5 m	Male	35.9	11.2	11.5	31.22	31.2	9.74	14.13	10	10	87	1	0	2	1.41	1.41	12.29	0.14	0	0.28	7	24
223	5 m	Male	34.4	10.9	9.11	37.76	31.69	11.96	10.73	28	28	64	3	3	2	3	3	6.87	0.32	0.32	0.21	7	35
218	5 m	Male	32.4	11.6	11.2	32	32.6	11.6	11.4	26	26.5	70.5	3.5	1	2	3	3	7	0.2	0.12	0.21	7	22
197	1 y 5 m	Male	29.4	9.2	8.11	36.25	31.29	11.34	5.13	30	30	67	2	1	0	1.54	1.54	3.44	0.1	0.05	0	7.5	11
194	1 y 5 m	Male	30.8	9.9	8.15	37.79	32.14	12.15	6.71	23	23	73	2	1	1	1.54	1.54	4.9	0.13	0.07	0.07	7.5	20
182	1 y 5 m	Male	36	11.7	8.67	41.52	32.5	13.49	5.5	10	10	85	4	1	0	0.55	0.55	4.67	0.22	0.06	0	7.5	11
183	1 y 5 m	Female	31	10.7	8.11	38.22	34.52	13.19	9.86	56	56	36	3	4	1	5.52	5.52	3.55	0.3	0.39	0.1	8	34
195	1 y 5 m	Female	27	9	6.75	40	33.33	13.33	12.52	45	45	47	4	3	1	5.63	5.63	5.88	0.5	0.38	0.13	7.5	27
178	1 y 5 m	Female	36.7	11.9	8.42	43.59	32.43	14.13	13.17	42	42	46	5	5	2	5.53	5.53	6.06	0.66	0.66	0.26	8	42
192	1 y 5 m	Female	35.2	11.3	8.14	43.24	32.1	13.88	14.14	28	28	67	4	0	1	3.96	3.96	9.47	0.57	0	0.14	8	21

## Sheet: S3
Table S3. Two-way ANOVA results for blood parameters in cattle by age and sex
HCT	Df	Sum Sq	Mean Sq	F value	Pr(>F)
Aged	2	44.3	22.17	0.672	0.525
Sex	1	2	1.97	0.06	0.81
Aged:Sex	2	21	10.49	0.318	0.732
Residuals	15	494.9	32.99
HGB
Aged	2	4.29	2.1433	0.852	0.446
Sex	1	0.03	0.0311	0.012	0.913
Aged:Sex	2	1.24	0.6219	0.247	0.784
Residuals	15	37.72	2.515
RBC
Aged	2	44.45	22.223	13.632	0.000423***
Sex	1	0.1	0.101	0.062	0.806995
Aged:Sex	2	0.41	0.207	0.127	0.881787
Residuals	15	24.45	1.63
MCV
Aged	2	618.7	309.33	31.662	0.00000414***
Sex	1	6.9	6.91	0.707	0.414
Aged:Sex	2	11.9	5.95	0.609	0.557
Residuals	15	146.5	9.77
MCHC
Aged	2	5.365	2.682	1.712	0.214
Sex	1	0.262	0.262	0.167	0.688
Aged:Sex	2	6.838	3.419	2.182	0.147
Residuals	15	23.501	1.567
MCH
Aged	2	82.02	41.01	64.829	0.0000000415***
Sex	1	0.56	0.56	0.888	0.361
Aged:Sex	2	2.55	1.28	2.019	0.167
Residuals	15	9.49	0.63
WBC
Aged	2	37.74	18.87	8.913	0.002812**
Sex	1	38.1	38.1	17.997	0.00071***
Aged:Sex	2	63.06	31.53	14.892	0.000274***
Residuals	15	31.76	2.12
NEU%
Aged	2	1391.1	695.6	10.04	0.00171**
Sex	1	1802.7	1802.7	26.021	0.00013***
Aged:Sex	2	119.6	59.8	0.863	0.4418
Residuals	15	1039.2	69.3
SEG%
Aged	2	1391.1	695.6	10.04	0.00171**
Sex	1	1802.7	1802.7	26.021	0.00013***
Aged:Sex	2	119.6	59.8	0.863	0.4418
Residuals	15	1039.2	69.3
LYM%
Aged	2	2499	1249.5	13.872	0.000388***
Sex	1	1883.8	1883.8	20.914	0.000366***
Aged:Sex	2	133.1	66.6	0.739	0.494257
Residuals	15	1351.1	90.1
MON%
Aged	2	14.86	7.429	1.399	0.277
Sex	1	0.4	0.397	0.075	0.788
Aged:Sex	2	13.37	6.683	1.258	0.312
Residuals	15	79.67	5.311
EOS%
Aged	2	79.93	39.96	3.528	0.0555
Sex	1	0	0	0	0.9853
Aged:Sex	2	17.29	8.65	0.763	0.4834
Residuals	15	169.92	11.33
BAS%
Aged	2	0.738	0.369	0.272	0.765
Sex	1	0.063	0.0635	0.047	0.832
Aged:Sex	2	1.817	0.9087	0.67	0.526
Residuals	15	20.333	1.3556
NEU
Aged	2	4.19	2.09	4.753	0.02518*
Sex	1	39.34	39.34	89.352	0.000000104***
Aged:Sex	2	8.13	4.07	9.232	0.00243
Residuals	15	6.6	0.44
SEG
Aged	2	4.19	2.09	4.753	0.02518*
Sex	1	39.34	39.34	89.352	0.000000104***
Aged:Sex	2	8.13	4.07	9.232	0.00243**
Residuals	15	6.6	0.44
LYM
Aged	2	78.23	39.12	13.676	0.000416***
Sex	1	0.58	0.58	0.203	0.658657
Aged:Sex	2	21.43	10.71	3.746	0.0479*
Residuals	15	42.9	2.86
MON
Aged	2	0.0277	0.01385	0.252	0.781
Sex	1	0.128	0.12803	2.326	0.148
Aged:Sex	2	0.12	0.05999	1.09	0.361
Residuals	15	0.8255	0.05503
EOS
Aged	2	0.4581	0.22904	2.864	0.0884
Sex	1	0.0497	0.04973	0.622	0.4427
Aged:Sex	2	0.1104	0.05522	0.69	0.5166
Residuals	15	1.1996	0.07997
BAS
Aged	2	0.01104	0.005519	0.328	0.726
Sex	1	0.00691	0.006914	0.411	0.531
Aged:Sex	2	0.02488	0.012439	0.739	0.494
Residuals	15	0.25255	0.016837
TP
Aged	2	8.975	4.488	50.835	0.000000208***
Sex	1	0.088	0.088	0.993	0.355
Aged:Sex	2	0.165	0.083	0.936	0.414
Residuals	15	1.324	0.088
TG
Aged	2	97.8	48.9	0.547	0.5899
Sex	1	747.4	747.4	8.357	0.0112*
Aged:Sex	2	189.7	94.9	1.061	0.3708
Residuals	15	1341.7	89.4
