# Supplementary material for: Age-Dependent Changes in Protist and Fungal Microbiota in a Peruvian Cattle Genetic Nucleus
Source: Preprints.org preprint supplement (doi:10.20944/preprints202406.1556.v1), 2024-06-24
Supplement: Supplementary file 1 [file supplementary]

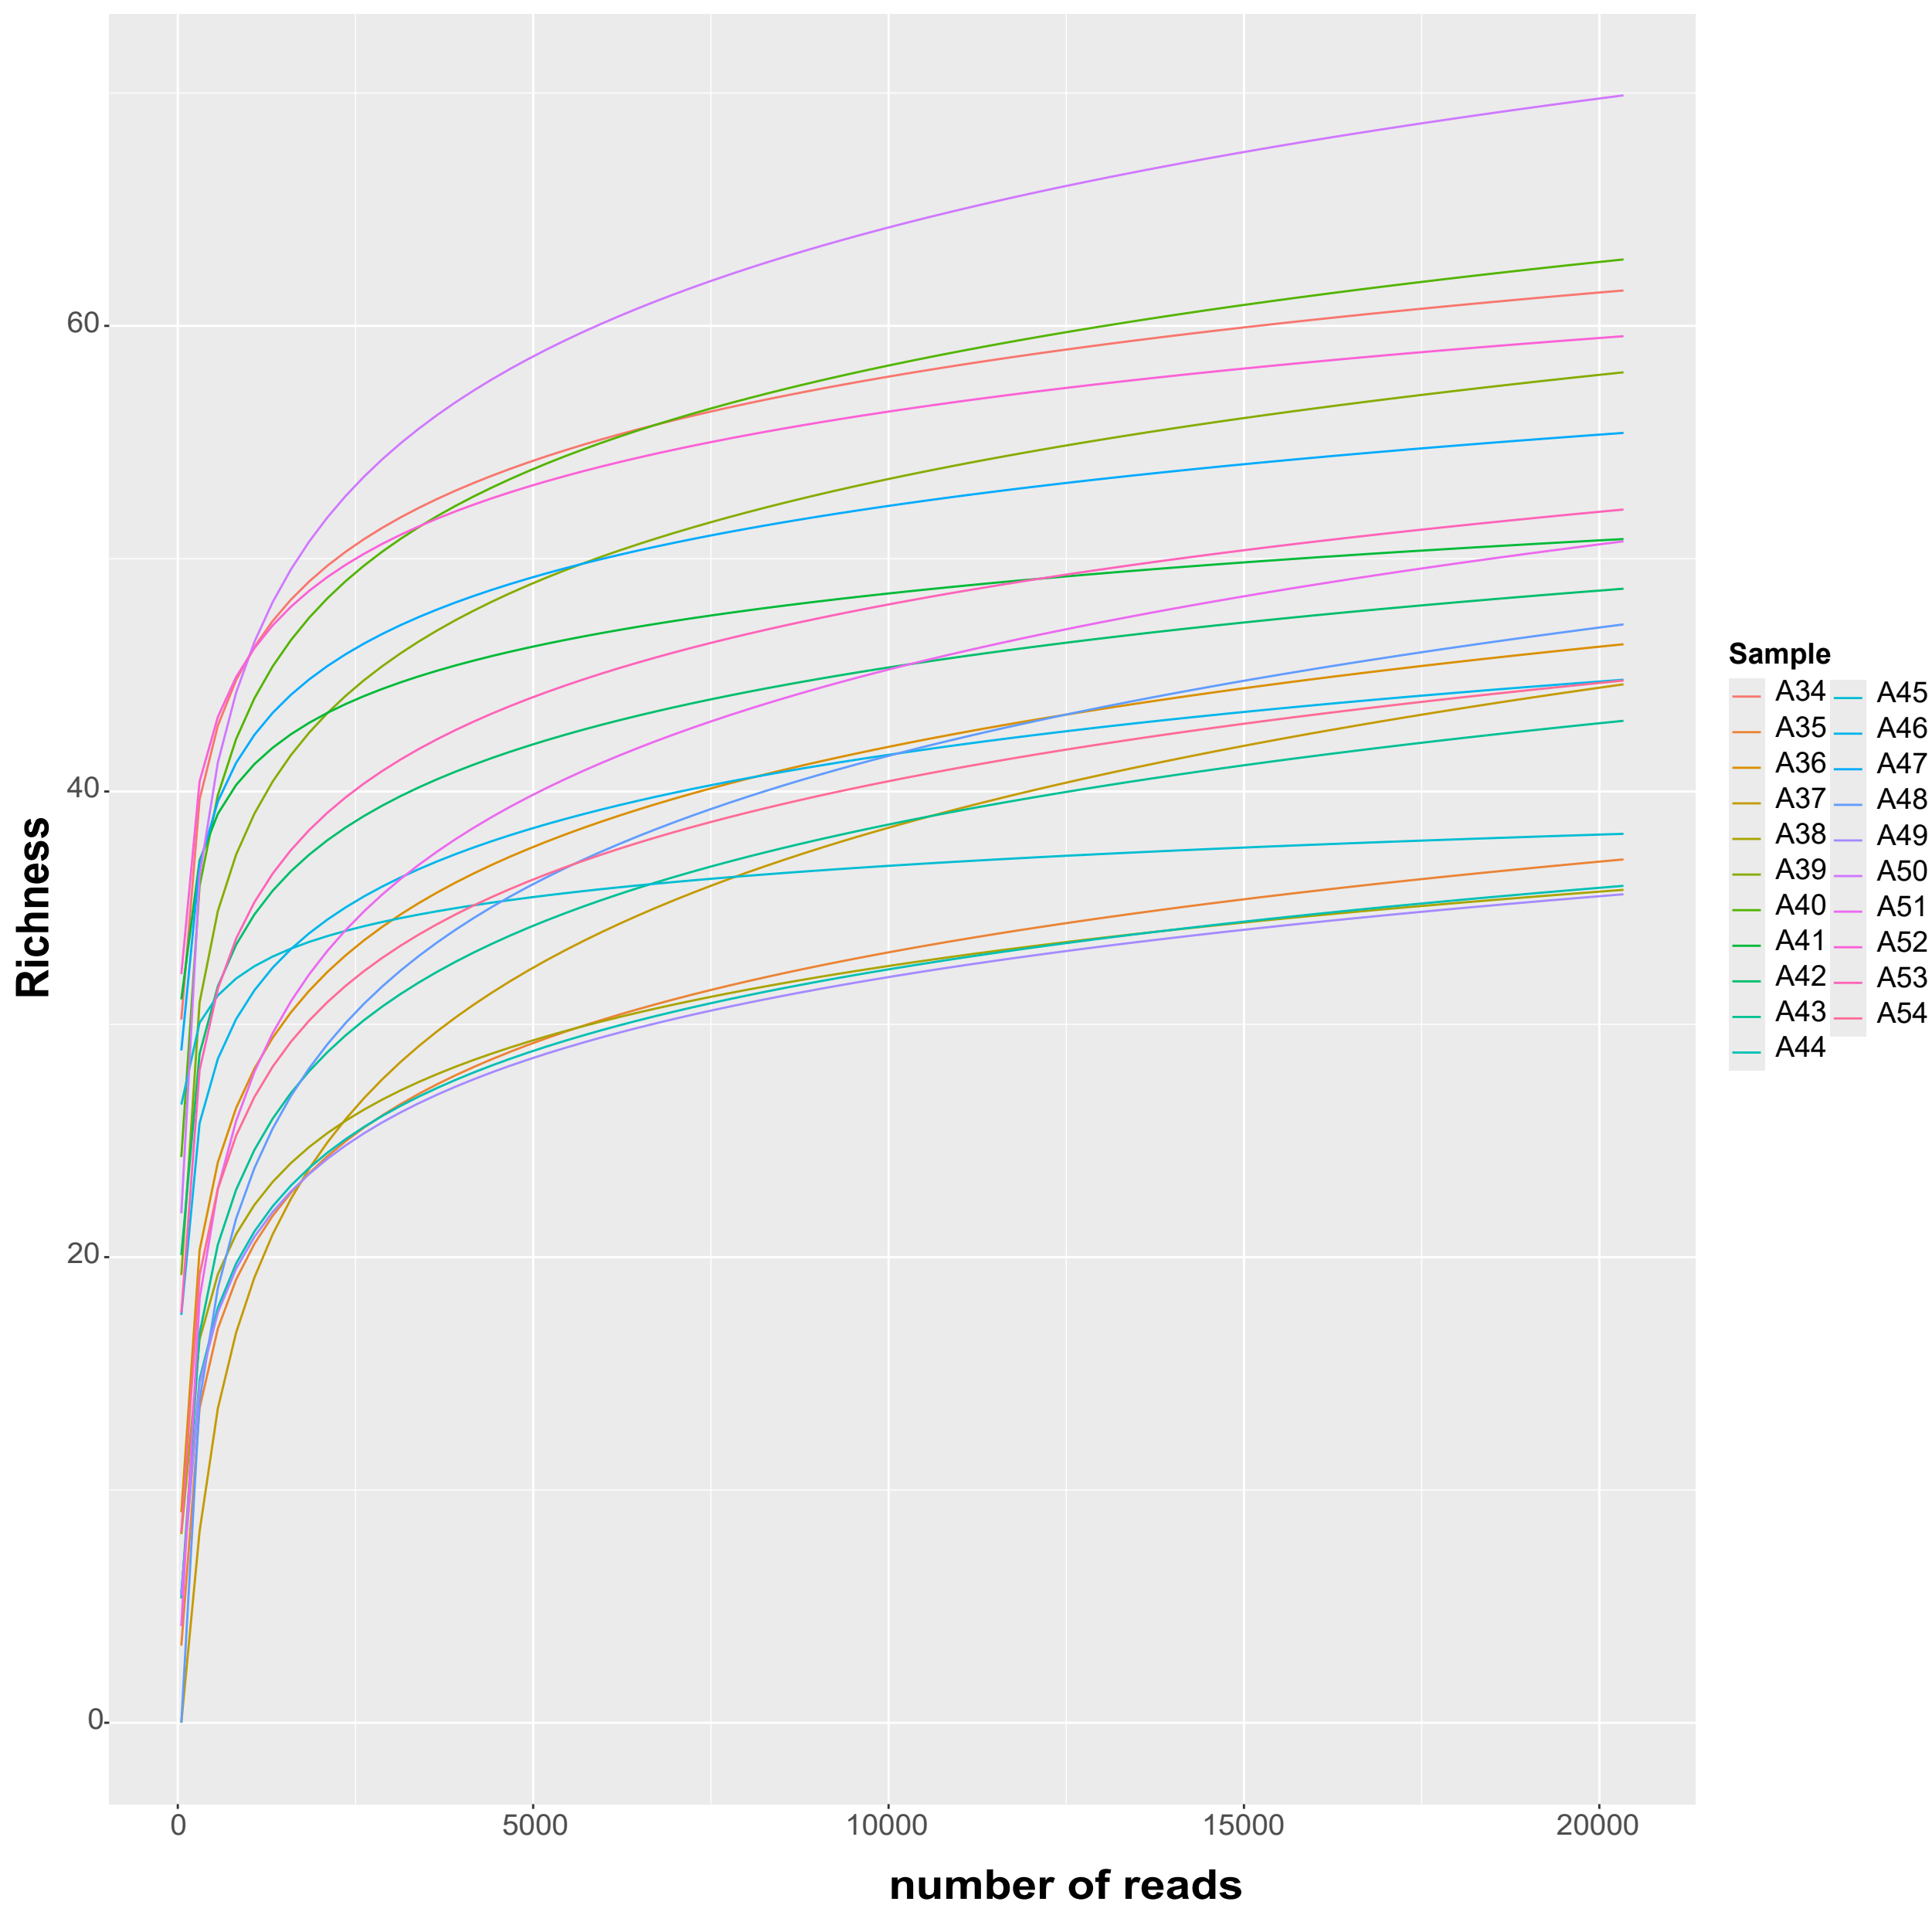

Figure S1: Species richness rarefaction curves show sequencing depth of 18S data obtained from fungi from gut samples

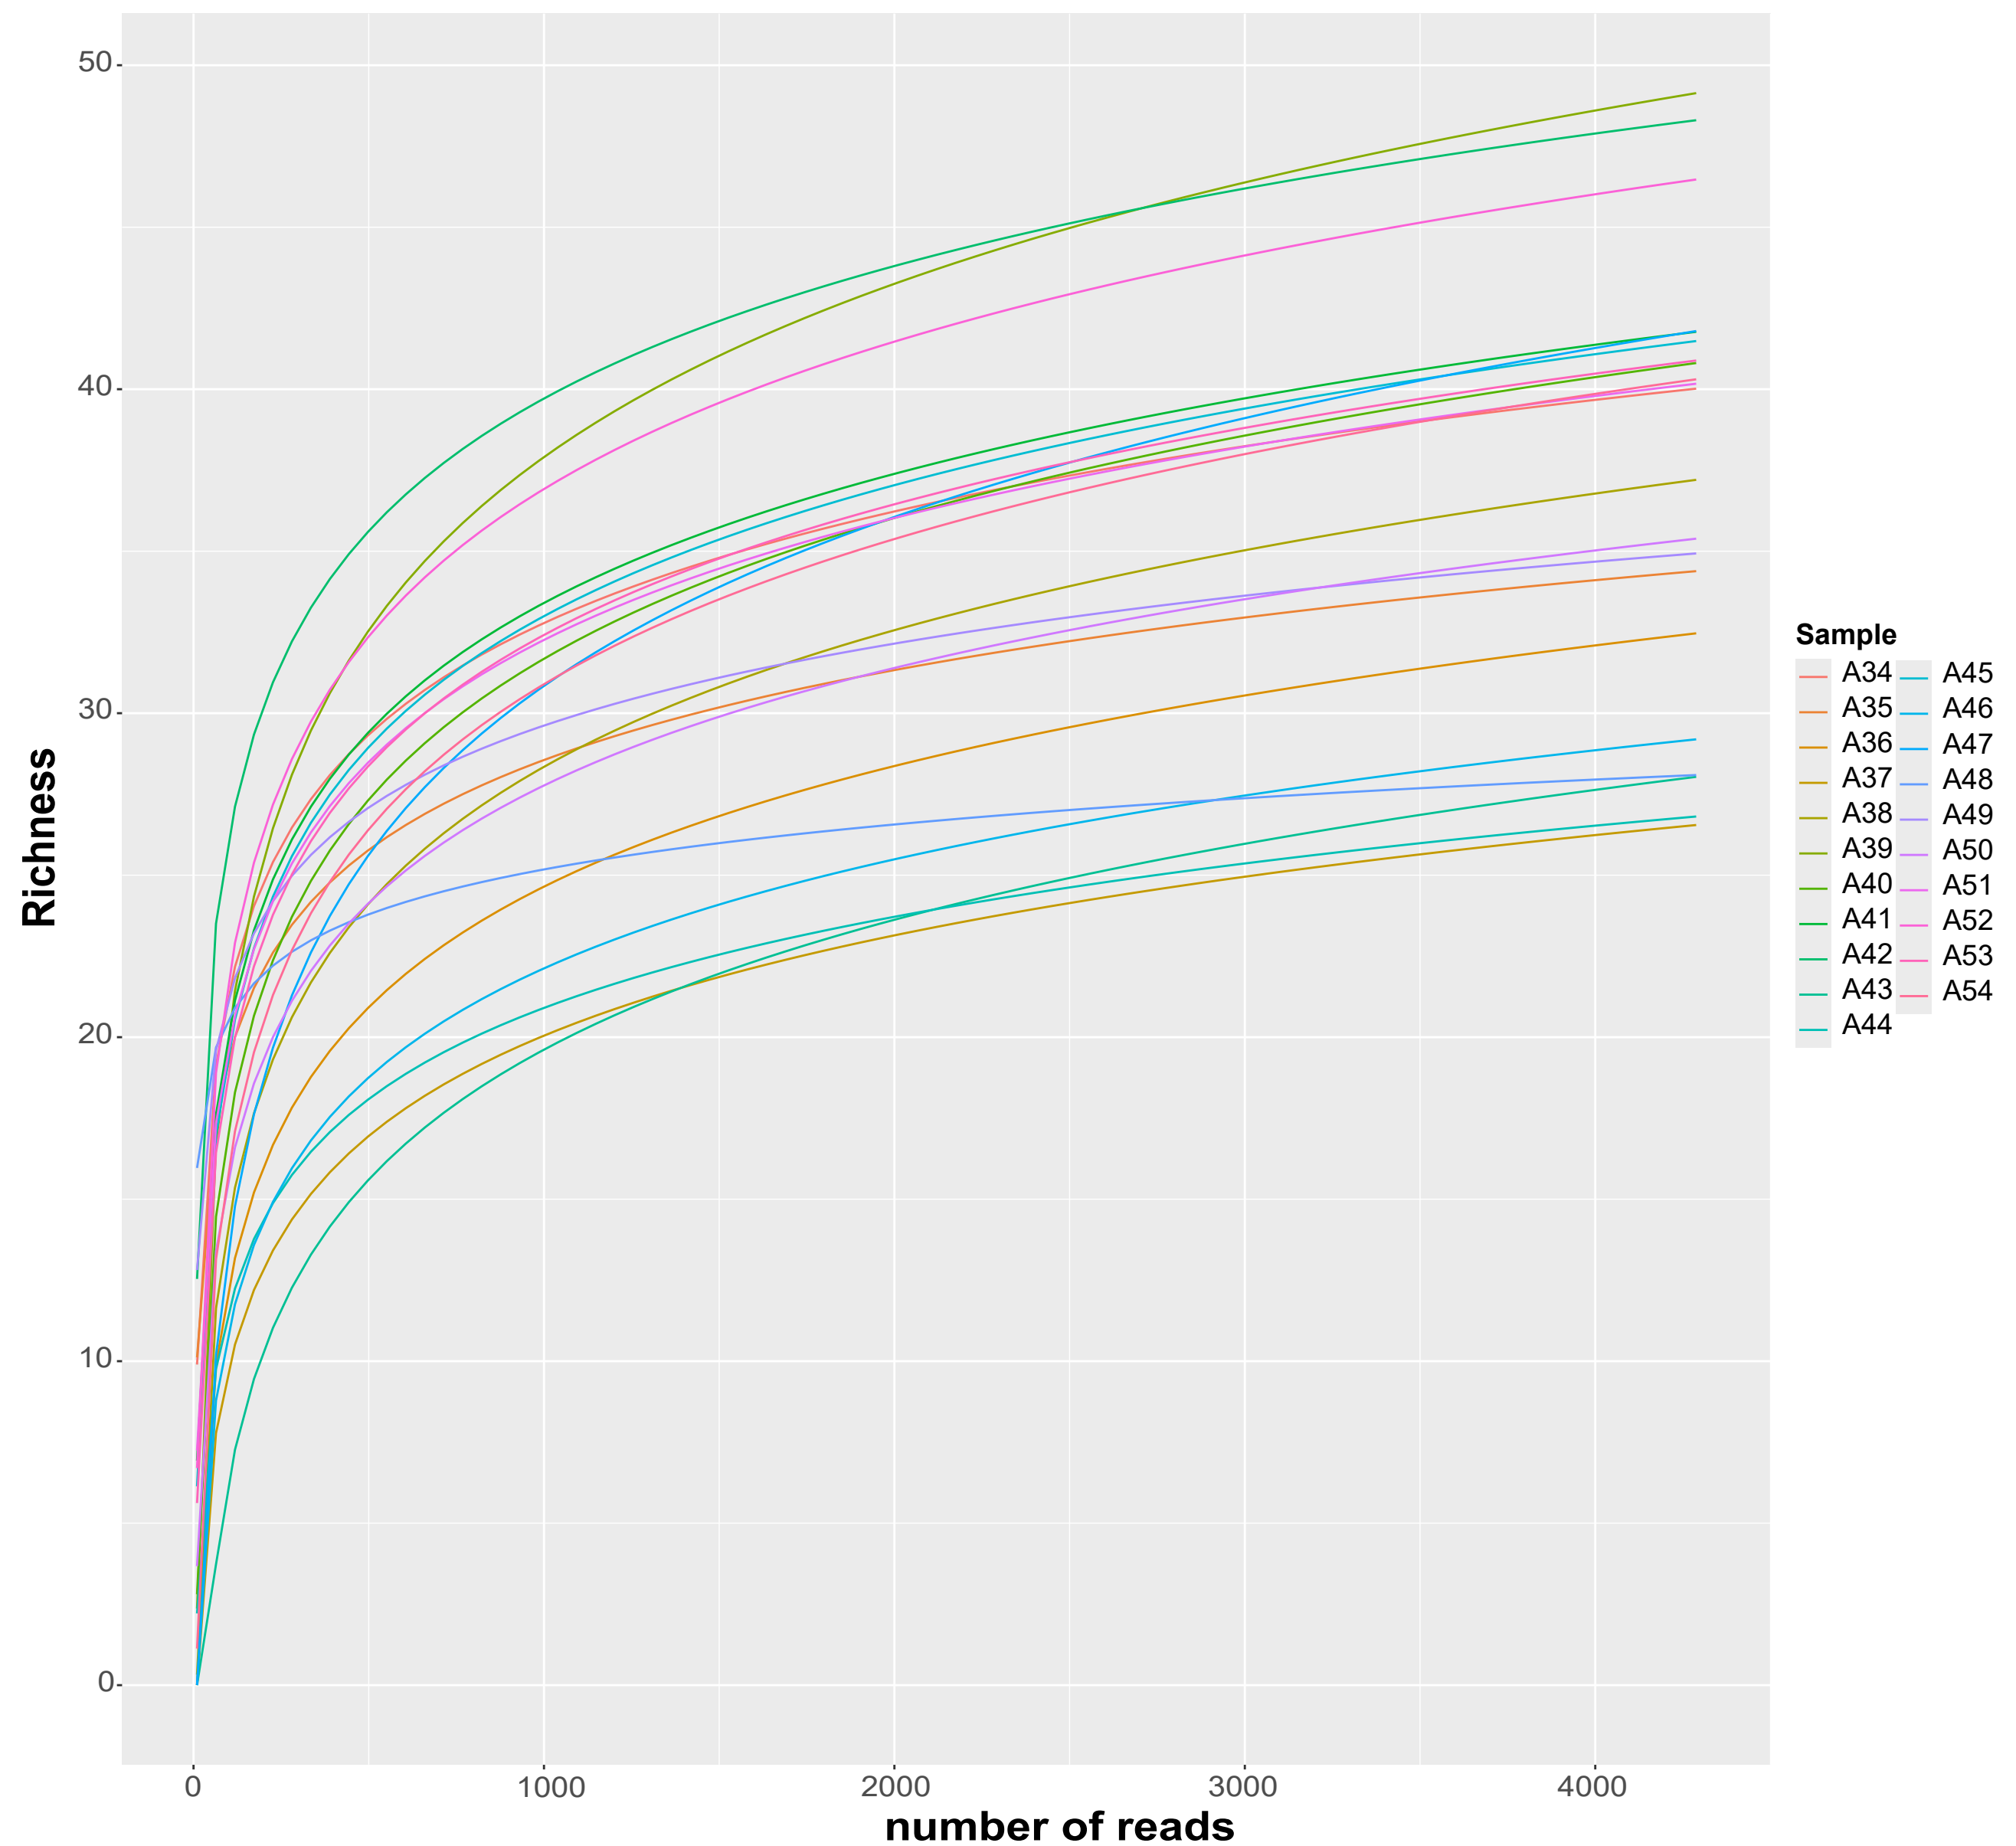

Figure S2: Species richness rarefaction curves show sequencing depth of 18S data obtained from protist from gut samples
